# Supplementary material
Source: PubMed Central journal article supplement (PMC6030851)
Supplement: kwy011huangwebmaterialfinal.pdf [file kwy011huangwebmaterialfinal.pdf]

## Web Material

Web Table 1. Postmenopausal OSA risk according to age at menopause among naturally postmenopausal women who never used postmenopausal hormone therapy<sup>a</sup>

|                  | No. of cases | HR   | 95% CI     |
|------------------|--------------|------|------------|
| Age at menopause |              |      |            |
| <40 years        | 13           | 0.76 | 0.42, 1.40 |
| 40-44 years      | 64           | 0.89 | 0.66, 1.17 |
| 45-49 years      | 346          | 1.03 | 0.89, 1.19 |
| 50-54 years      | 710          | 1.00 | Referent   |
| ≥55 years        | 189          | 1.12 | 0.94, 1.33 |
| P for trend      |              |      | 0.17       |

Abbreviations: CI, confidence interval; HR, hazard ratio; OSA, obstructive sleep apnea

<sup>a</sup>Stratified by age in months and calendar years, and adjusted for body mass index (<20.0, 20.0–24.9, 25.0–29.9, 30.0–34.9, 35.0–39.9, ≥40.0 kg/m<sup>2</sup>), waist circumference (<76, 76–87, 88–95, ≥96 cm), smoking (never, past, current), alcohol consumption (none, <5.0, 5.0–14.9, 15.0–29.9, ≥30.0 g/day), duration of postmenopausal hormone therapy by type (never, <5.0, 5.0–9.9, ≥10.0 years), race/ethnicity (white, non-white), history of diabetes (yes, no), history of hypertension (yes, no), duration of oral contraceptive use (never, <1.0, 1.0–4.9, 5.0–9.9, ≥10.0 years), parity (continuous), physical activity (<3.0, 3.0–8.9, 9.0–17.9, 18.0–26.9, ≥27.0 MET-h/week), Alternate Healthy Eating Index (in quintiles) and sleep duration (≤5, 6, 7, 8, ≥9 hours/day)

Web Table 2. Odds ratios for OSA diagnosis with EDS, OSA diagnosis without EDS, high-risk group without diagnosed OSA (versus low-risk group) according to type of menopause using multinomial logistic regression

| Type of menopause        | High-risk group without OSA diagnosis <sup>a</sup> (n=25,103) |            | OSA diagnosis without EDS (n=3,613) |            | OSA diagnosis with EDS (n=659) |            |
|--------------------------|---------------------------------------------------------------|------------|-------------------------------------|------------|--------------------------------|------------|
|                          | OR                                                            | 95% CI     | OR                                  | 95% CI     | OR                             | 95% CI     |
| Natural                  | 1.00                                                          | Referent   | 1.00                                | Referent   | 1.00                           | Referent   |
| Surgical                 | 1.08                                                          | 1.04, 1.13 | 1.48                                | 1.35, 1.63 | 1.80                           | 1.47, 2.20 |
| P for trend <sup>c</sup> |                                                               |            | <0.0001                             |            |                                |            |

Abbreviations: CI, confidence interval; EDS, excessive daytime sleepiness; OR, odds ratio; OSA, obstructive sleep apnea

<sup>a</sup>Defined as reporting habitual snoring

<sup>b</sup>Adjusted for baseline factors including age (continuous), body mass index (<20.0, 20.0–24.9, 25.0–29.9, 30.0–34.9, 35.0–39.9, ≥40.0 kg/m<sup>2</sup>), waist circumference (<76, 76–87, 88–95, ≥96 cm), smoking (never, past, current), alcohol consumption (none, <5.0, 5.0–14.9, 15.0–29.9, ≥30.0 g/day), duration of postmenopausal hormone therapy by type (never, <5.0, 5.0–9.9, ≥10.0 years), race/ethnicity (white, non-white), history of diabetes (yes, no), history of hypertension (yes, no), duration of oral contraceptive use (never, <1.0, 1.0–4.9, 5.0–9.9, ≥10.0 years), parity (continuous), physical activity (<3.0, 3.0–8.9, 9.0–17.9, 18.0–26.9, ≥27.0 MET-h/week), Alternate Healthy Eating Index (in quintiles) and sleep duration (≤5, 6, 7, 8, ≥9 hours/day)

<sup>c</sup>P for trend was calculated using ordinal logistic regression

Web Table 3. Joint associations of type of menopause and anthropometric measures with OSA risk in postmenopausal women<sup>a</sup>

| Anthropometric measures                | Type of menopause |            |          |            |
|----------------------------------------|-------------------|------------|----------|------------|
|                                        | Natural           |            | Surgical |            |
|                                        | HR                | 95% CI     | HR       | 95% CI     |
| <b>BMI</b>                             |                   |            |          |            |
| <30 kg/m <sup>2</sup>                  | 1.00              | Referent   | 1.38     | 1.23, 1.55 |
| ≥30 kg/m <sup>2</sup>                  | 2.64              | 2.41, 2.89 | 3.20     | 2.85, 3.60 |
| <b>Waist circumference<sup>b</sup></b> |                   |            |          |            |
| <88 cm                                 | 1.00              | Referent   | 1.36     | 1.18, 1.56 |
| ≥88 cm                                 | 1.39              | 1.24, 1.55 | 1.71     | 1.49, 1.96 |

Abbreviations: CI, confidence interval; HR, hazard ratio; OSA, obstructive sleep apnea

<sup>a</sup>Stratified by age in months and calendar years, and adjusted for (except the stratification variable) age at menopause, body mass index (<20.0, 20.0–24.9, 25.0–29.9, 30.0–34.9, 35.0–39.9, ≥40.0 kg/m<sup>2</sup>), waist circumference (<76, 76–87, 88–95, ≥96 cm), smoking (never, past, current), alcohol consumption (none, <5.0, 5.0–14.9, 15.0–29.9, ≥30.0 g/day), duration of postmenopausal hormone therapy by type (never, <5.0, 5.0–9.9, ≥10.0 years), race/ethnicity (white, non-white), history of diabetes (yes, no), history of hypertension (yes, no), duration of oral contraceptive use (never, <1.0, 1.0–4.9, 5.0–9.9, ≥10.0 years), parity (continuous), physical activity (<3.0, 3.0–8.9, 9.0–17.9, 18.0–26.9, ≥27.0 MET-h/week), Alternate Healthy Eating Index (in quintiles) and sleep duration (≤5, 6, 7, 8, ≥9 hours/day)

<sup>b</sup>Among a subset of participants with waist circumference measurements

Web Table 4. Prevalence of self-reported OSA among postmenopausal women in the NHS/NHSII compared to the projected US prevalence of moderate-to-severe sleep-disordered breathing (AHI $\geq$ 15)

|                 | NHS/NHSII <sup>a</sup> |            | US prevalence estimates <sup>b</sup> |            |
|-----------------|------------------------|------------|--------------------------------------|------------|
|                 | Prevalence             | 95% CI     | Prevalence                           | 95% CI     |
| Overall         | 6.4                    | 6.2, 6.7   | 9.0                                  | 7.0, 11.0  |
| BMI <25.0       | 2.3                    | 2.1, 2.4   | 1.4                                  | 0.7, 2.5   |
| BMI 25.0-29.9   | 5.0                    | 4.8, 5.2   | 4.5                                  | 3.0, 6.3   |
| BMI 30.0-39.9   | 13.2                   | 12.8, 13.6 | 13.9                                 | 10.4, 17.4 |
| BMI $\geq$ 40.0 | 30.2                   | 28.9, 31.5 | 33.5                                 | 25.7, 40.8 |

Abbreviations: BMI, body mass index; CI, confidence interval; NHS, Nurses' Health Study; NHSII, Nurses' Health Study II; OSA, obstructive sleep apnea

<sup>a</sup>Among postmenopausal women

<sup>b</sup>The numbers were extracted from Peppard et al. Table 3 for women aged 50-70 years (6)
